# Supplementary material for: Intestinal Permeability Study of Clinically Relevant Formulations of Silibinin in Caco-2 Cell Monolayers
Source: MDPI journal article supplement (doi:10.3390/ijms20071606), 2019-03-31
Supplement: s1 [file s1]

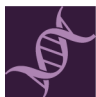

*Communication*

# **Intestinal permeability study of clinically relevant formulations of silibinin in Caco-2 cell monolayers**

**Almudena Pérez-Sánchez, Elisabet Cuyàs, Verónica Ruiz-Torres, Luz Agulló-Chazarra,  
Sara Verdura, Isabel González-Álvarez, Marival Bermejo, Jorge Joven,  
Vicente Micol, Joaquim Bosch-Barrera, Javier A. Menendez**

## **SUPPLEMENTARY INFORMATION**

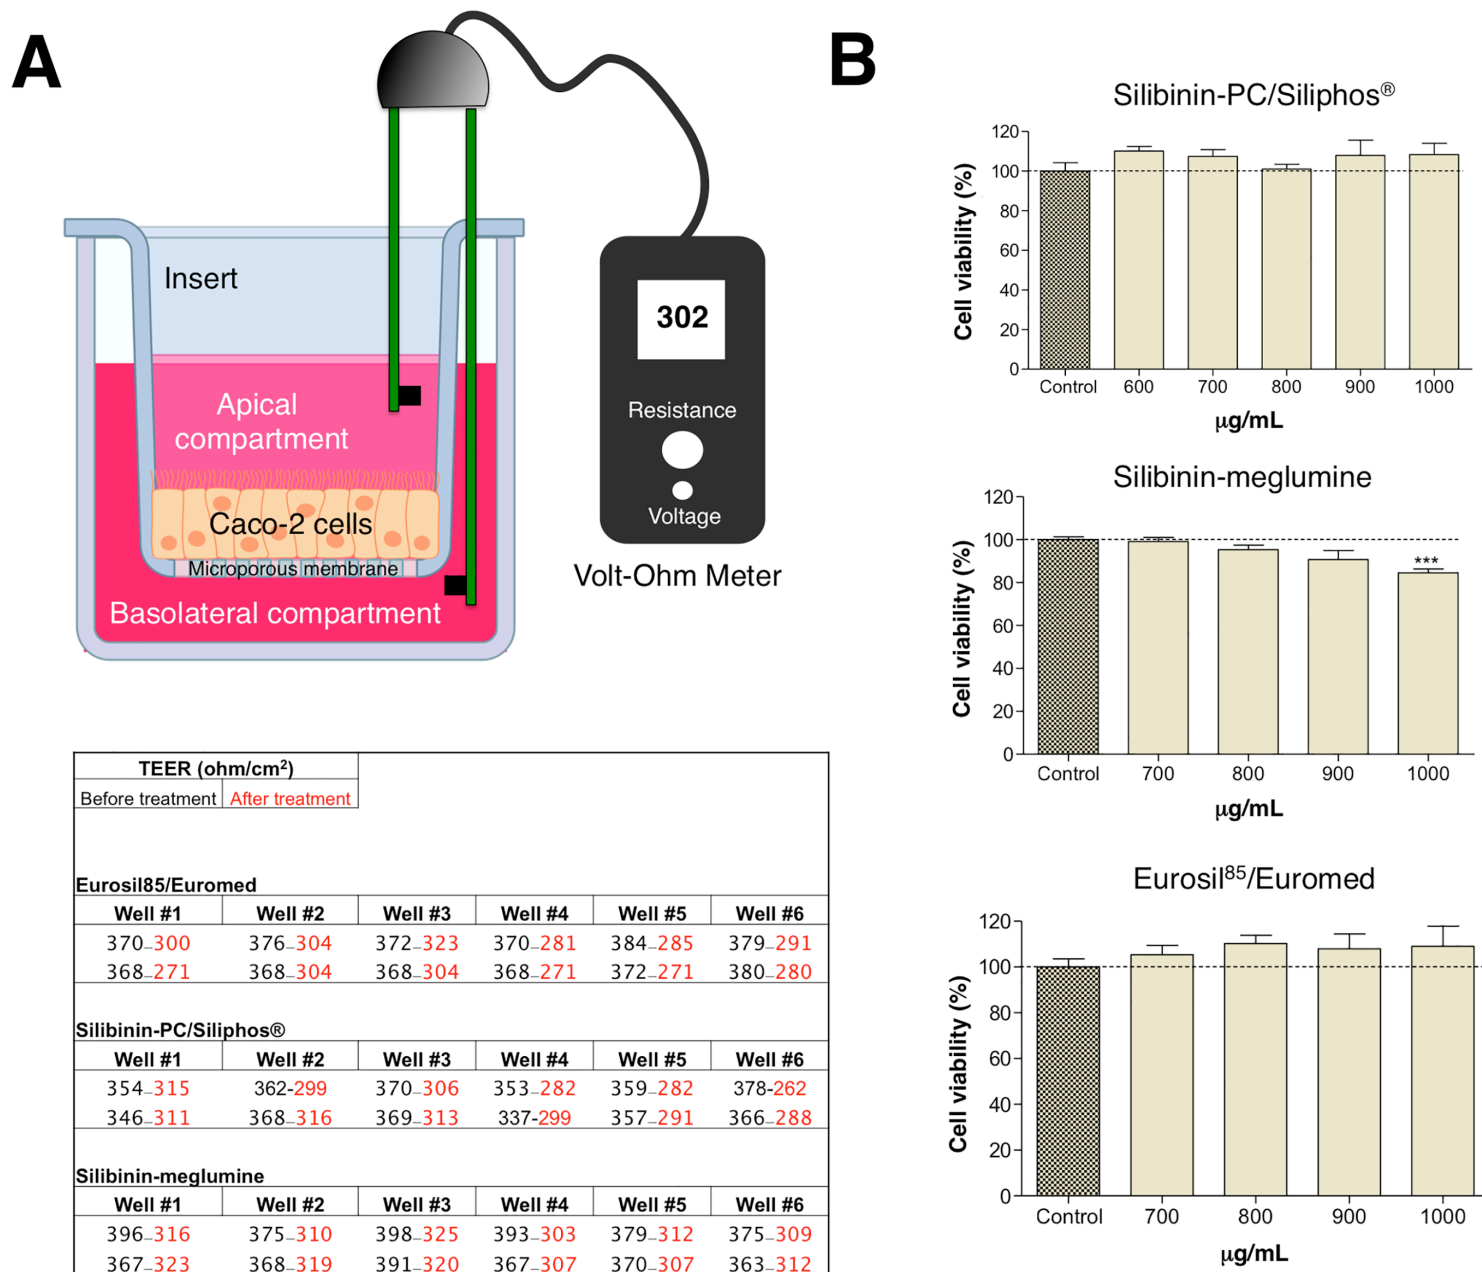

**Supplementary Figure S1. A.** Changes in the TEER value of Caco-2 monolayers exposed to different silibinin formulations. **B.** Viability of Caco-2 cells after exposure to graded concentrations of silibinin formulations measured by 3-(4,5-Dimethylthiazol-2-yl)-2,5-diphenyl-tetrazolium bromide (MTT) assays. Data are presented as percentage of cell viability relative to viability of control cells. Data are expressed as mean  $\pm$  SEM of 3 independent experiments. Statistical analysis was determined by one-way ANOVA with Tukey's post-hoc test (\*\* $P < 0.001$ ).
